# Supplementary material for: Can We Quantify If It’s a CURE?
Source: PubMed Central journal article supplement — J Microbiol Biol Educ. 2023 Jan 23;24(1):e00210-22. doi: 10.1128/jmbe.00210-22 (PMC10117072; doi:10.1128/jmbe.00210-22), 2023-01-23
Supplement: jmbe.00210-22-s0001.pdf [file jmbe.00210-22-s0001.pdf]

Supplementary Materials

Table S1: Modified prompts for the LCAS for mentored research students

|                                                           |     |                                                                                                                                                  |
|-----------------------------------------------------------|-----|--------------------------------------------------------------------------------------------------------------------------------------------------|
| During my research this semester, I was encouraged to ... |     |                                                                                                                                                  |
| Collaboration                                             | C1  | discuss elements of my investigation with others in my lab                                                                                       |
|                                                           | C2  | reflect on what I was learning                                                                                                                   |
|                                                           | C3  | contribute my ideas and suggestions during lab discussions                                                                                       |
|                                                           | C4  | help others collect or analyze data                                                                                                              |
|                                                           | C5  | provide constructive criticism to labmates and challenge each other's interpretations                                                            |
|                                                           | C6  | share the problems I encountered during my investigation and seek input on how to address them                                                   |
| During my research this semester, I was expected to ...   |     |                                                                                                                                                  |
| Discovery & Relevance                                     | DR1 | generate novel results that are unknown to the PI and that could be of interest to the broader scientific community or others outside of the lab |
|                                                           | DR2 | conduct an investigation to find something previously unknown to myself, others in the lab, and the PI                                           |
|                                                           | DR3 | formulate my own research questions or hypothesis to guide an investigation                                                                      |
|                                                           | DR4 | develop new arguments based on data                                                                                                              |
|                                                           | DR5 | explain how my work has resulted in new scientific knowledge                                                                                     |
| During my research this semester, I was expected to ...   |     |                                                                                                                                                  |
| Iteration                                                 | I1  | revise or repeat work to account for errors or fix problems                                                                                      |
|                                                           | I2  | change the methods of the investigation if it was not unfolding as predicted                                                                     |
|                                                           | I3  | share and compare data with others in the lab                                                                                                    |
|                                                           | I4  | collect and analyze additional data to address new questions or further test hypotheses that arose during the investigation                      |
|                                                           | I5  | revise or repeat analyses based on feedback                                                                                                      |
|                                                           | I6  | revise drafts of papers or presentations about my investigation based on feedback                                                                |

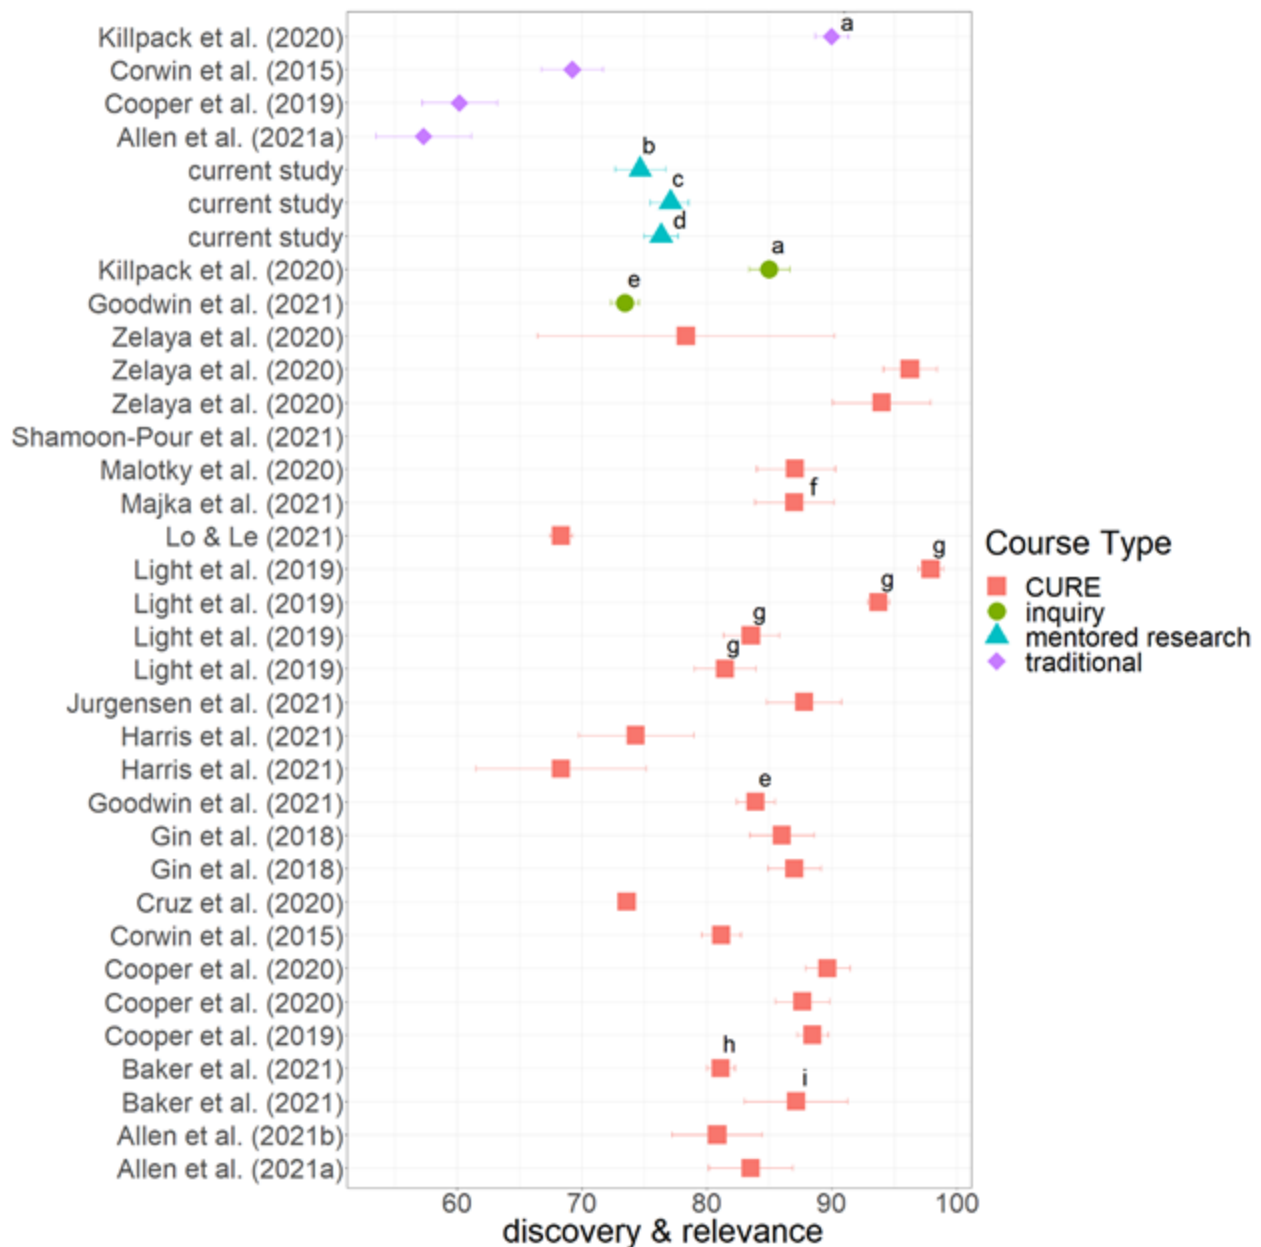

Figure S1: Variation among laboratory course types in “discovery and relevance” scores. The construct scores were scaled to a percentage of the total possible score. Values represent means and standard errors. Letters near points refer to the following: a, 4-point scale for discovery and iteration; b, students in the current study who are working in their current research lab for the first semester; c, students in the current study who are working on their current research project for the first semester; d, all students in the current study; e, 5-point collaboration scale, dropped item I1 from iteration scale and item D3 from discovery scale; f, 5-point scale for all scales, dropped item D1 from discovery scale; g, standard error estimated from the range and the sample size following (1); h, summary statistics provided by author, 5-point collaboration scale; i, summary statistics provided by author.

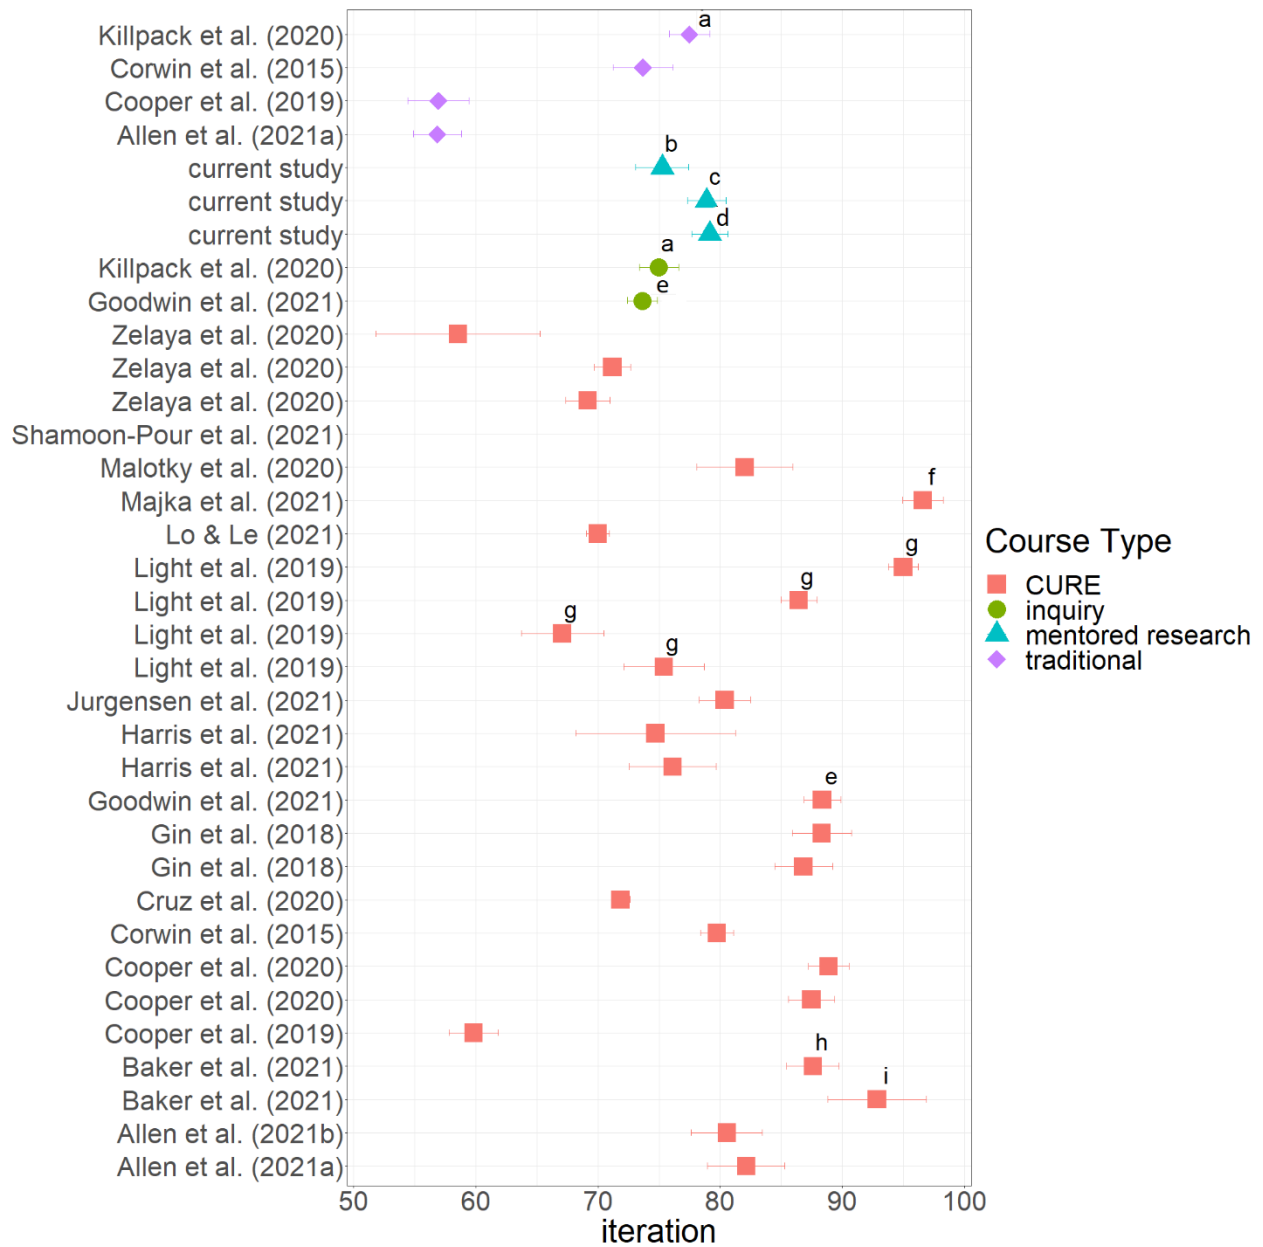

Figure S2: Variation among laboratory course types in “iteration” scores. The construct scores were scaled to a percentage of the total possible score. Values represent means and standard errors. Data point labels are the same as in Figure 2.

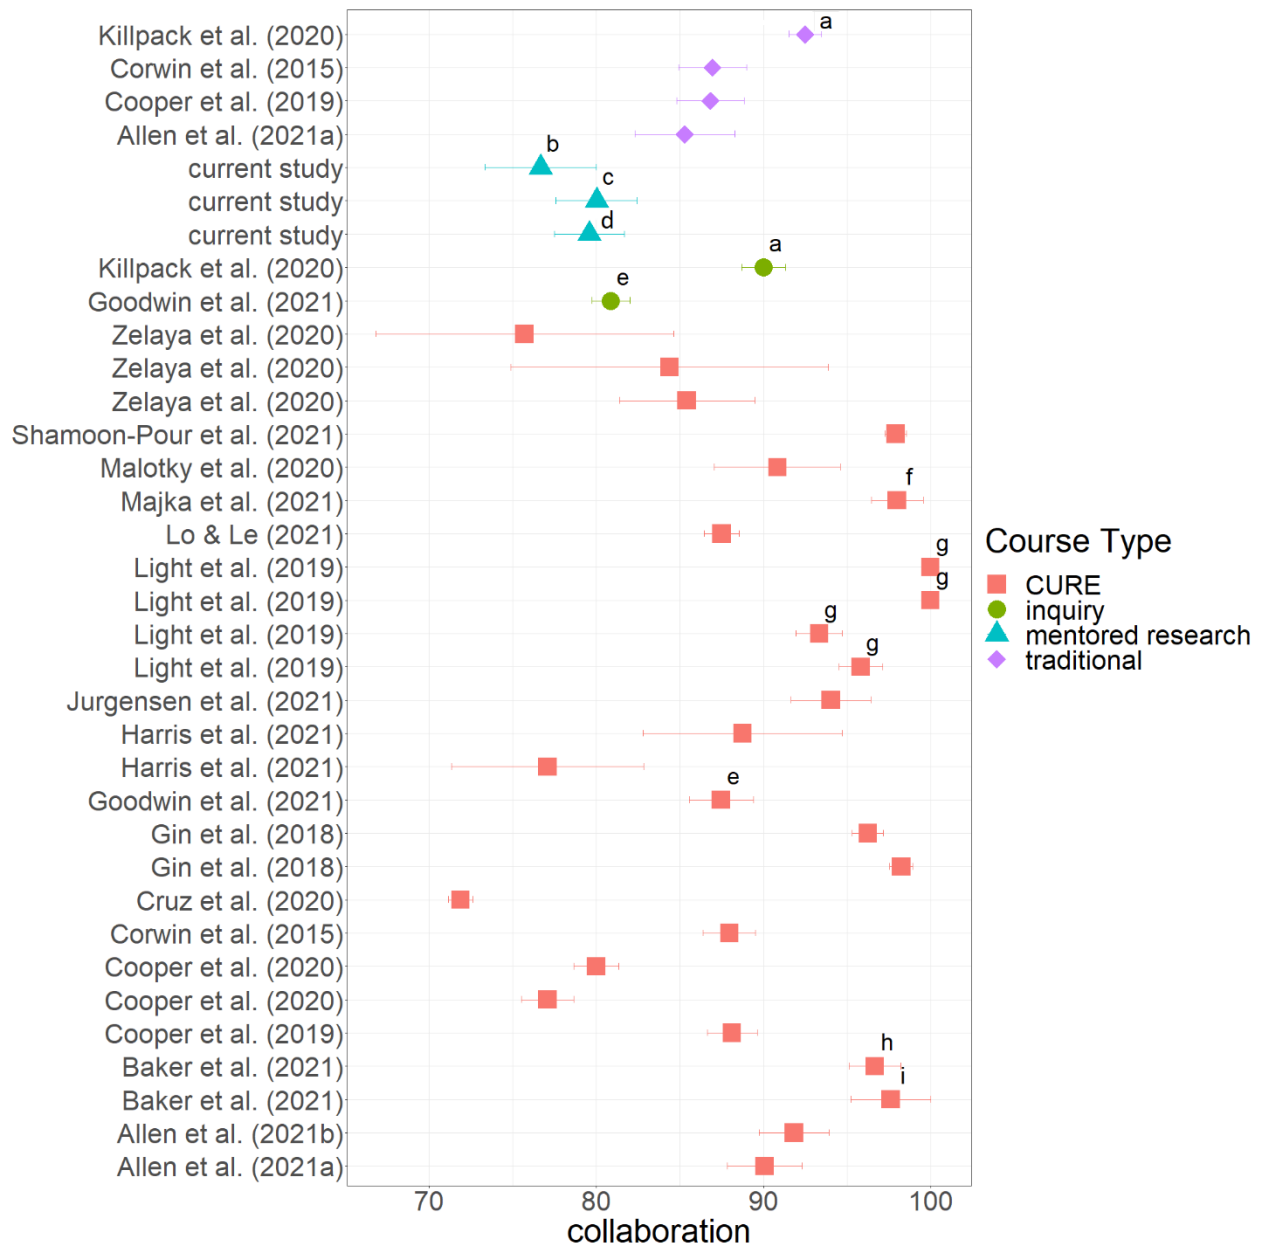

Figure S3: Variation among laboratory course types in “collaboration” scores. The construct scores were scaled to a percentage of the total possible score. Values represent means and standard errors. Data point labels are the same as in Figure 2.

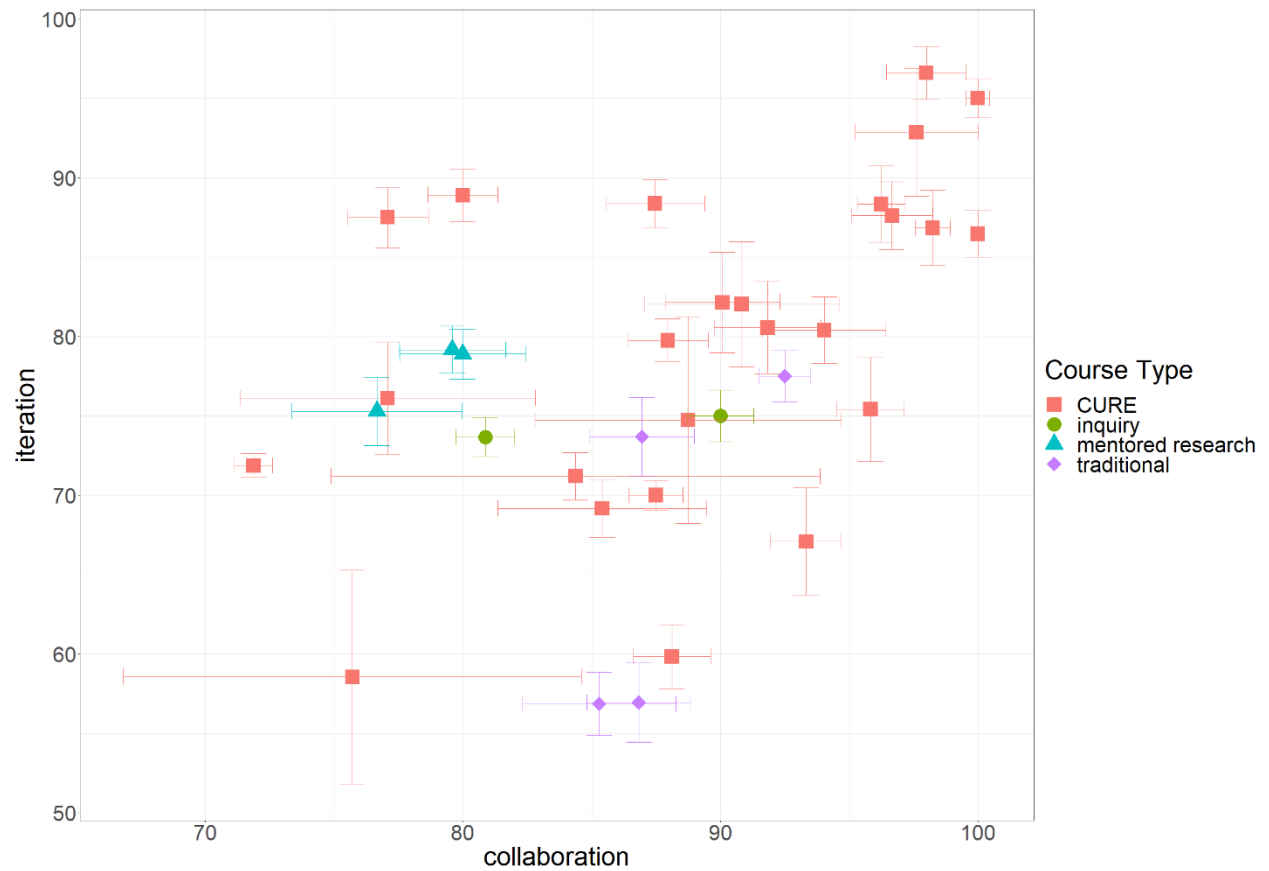

Figure S4: Bivariate plot of “iteration” and “collaboration” scores based on laboratory course type. The construct scores were scaled to a percentage of the total possible score. Values represent means and standard errors.

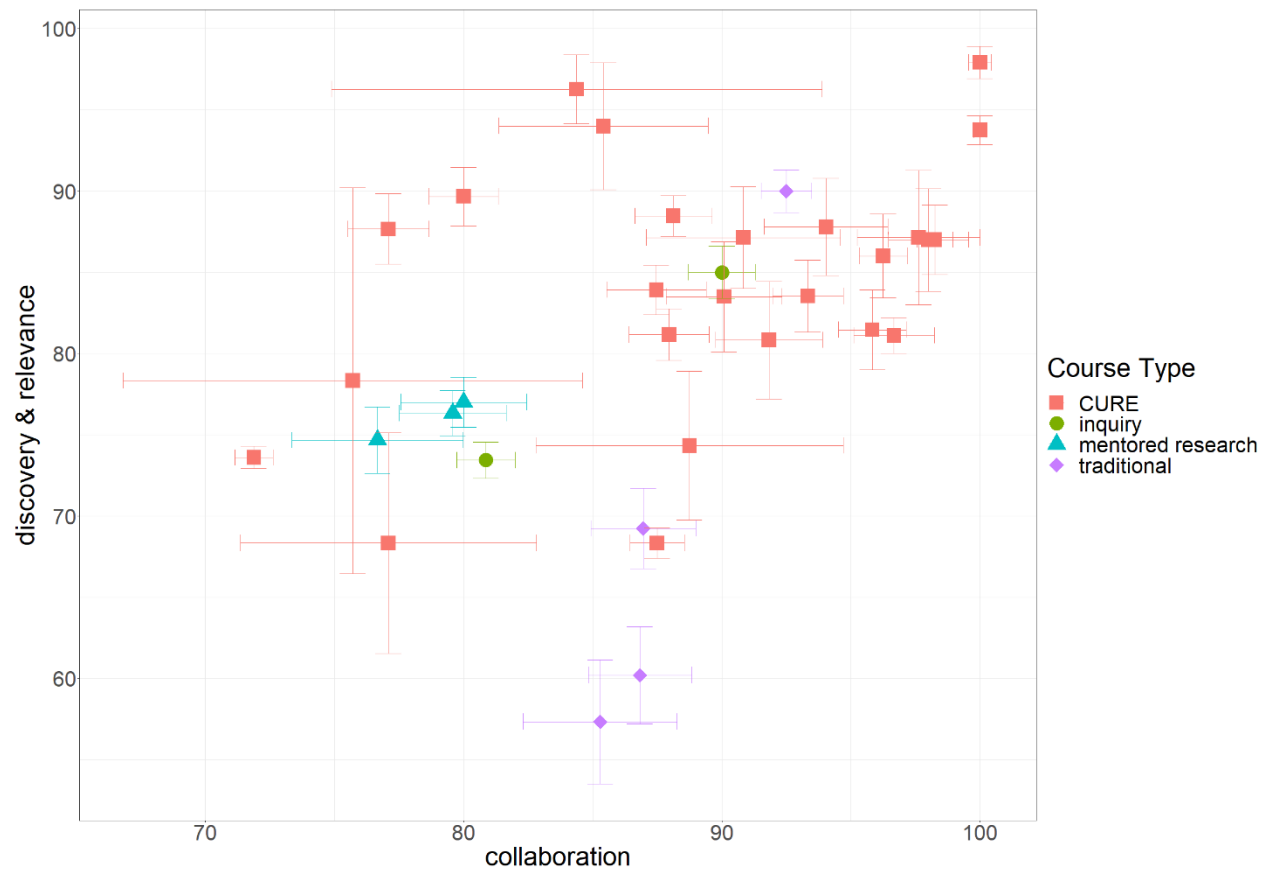

Figure S5: Bivariate plot of “discovery and relevance” and “collaboration” scores based on laboratory course type. The construct scores were scaled to a percentage of the total possible score. Values represent means and standard errors.

#### References

1. Hozo SP, Djulbegovic B, Hozo I. 2005. Estimating the mean and variance from the median, range, and the size of a sample. *BMC Medical Research Methodology* 5:13.
